# Supplementary material for: Studies on the Assembly Characteristics of Large Subunit Ribosomal Proteins in S. cerevisae
Source: PLoS One. 2013 Jul 10;8(7):e68412. doi: 10.1371/journal.pone.0068412 (PMC3707915; doi:10.1371/journal.pone.0068412)
Supplement: Figure S3 — (XLSX) [file pone.0068412.s003.xlsx]

## Sheet: Sheet1
TK	name	yeast marker	origin / cloning strategy
	YEPlac195
	pBS1539	URA3	Euroscarf
	pYM12		Knop et al., 1999
	Ycplac33	URA3
TK230	YCplac111GAL	LEU2	Ferreira-Cerca et al., Mol. Cell 20 (2), p. 263-275
TK349	YEplac195-pRPS28-short-FLAG	URA3	product of a PCR with genomic DNA and primer O581/O582 (=RPS28 promoter from positions -245 until +1) EcoRI/BamHI digested and cloned into Yeplac195
TK391	pGAL-RPS26-FLAG	LEU2	product of a PCR reaction with yeast genomic DNA as template and primers O618/O496 was cloned BamHI/PstI in TK230
TK487	pRPS28-RPS24-FLAG	URA3	Ferreira-Cerca et al., 2007 (suppl. data)
TK584	Yep-pRPS28KpnI-Ct-FLAG	URA3	Oligonucletides O947 and O948 were hybridised, phosphorylated and cloned into BamHI/PstI digested K487
TK640	Yep-pRPS28eGFP-Ct-FLAG	URA3	product of a PCR with Vector pYM12 and primers O989/O990 was KpnI/BamHI digested and cloned into TK584
TK642	Ycp-pRPS28-eGFP-Ct-FLAG	URA3	EcoRI/HindIII cassette from TK640 was cloned into Ycplac33
TK789	YEplac195-MCS	URA3	TK349 was EcoRI/HindIII digested, filled with Klenow and blunt ligated
TK792	YEplac195 pRPS28 FLAG modified	URA3	product of a PCR with K349 as template and primers O1266/O1267 was cloned KasI into K789
TK808	pGAL-RPL10	LEU2	Pöll et al., 2009
TK812	pGAL-RPL23	LEU2	Pöll et al., 2009
TK813	pGAL-RPL33	LEU2	Pöll et al., 2009
TK818	pGAL-RPL1B	LEU2	Pöll et al., 2009
TK819	pGAL-RPL2	LEU2	Pöll et al., 2009
TK819	pGAL-RPL2	LEU2	Pöll et al., 2009
TK822	pGAL-RPL3	LEU2	Pöll et al., 2009
TK823	pGAL-RPL13A	LEU2	Pöll et al., 2009
TK846	pGAL-RPL17A	LEU2	Pöll et al., 2009
TK852	pGAL-RPL5	LEU2	Pöll et al., 2009
TK855	pGAL-RPL27A	LEU2	Pöll et al., 2009
TK857	pGAL-RPL35A	LEU2	Pöll et al., 2009
TK865	pGAL-RPL25	LEU2	Pöll et al., 2009
TK865	pGAL-RPL25	LEU2	Pöll et al., 2009
TK881	YCplac111GAL-RPL43	LEU2	Pöll et al., 2009
TK881	YCplac111GAL-RPL43	LEU2	Pöll et al., 2009
TK882	YCplac111GAL-RPL8B	LEU2	Pöll et al., 2009
TK884	YCplac111GAL-RPL19B	LEU2	Pöll et al., 2009
TK885	YCplac111GAL-RPL21A	LEU2	Pöll et al., 2009
TK887	YCplac111GAL-Ubq-RPL40A	LEU2	product of a PCR with genomic DNA and primers O1438/O1424 was BamHI/PstI digested and cloned into TK792
TK888	YCplac111GAL-RPL40A-minus Ubq moiety	LEU2	Pöll et al., 2009 (suppl. data)
TK942	YEp-pRPS28-FLAG-RPL23	URA3	BamHI / PstI cassette from TK812 was cloned into TK792
TK943	YEp-pRPS28-FLAG-RPL33	URA3	BamHI / PstI cassette from TK813 was cloned into TK792
TK945	YEp-pRPS28-FLAG-RPL1B	URA3	BamHI / PstI cassette from TK818 was cloned into TK792
TK951	YEp-pRPS28-FLAG-RPL17A	URA3	BamHI / PstI cassette from TK846 was cloned into TK792
TK952	YEp-pRPS28-FLAG-RPL5	URA3	BamHI / PstI cassette from TK852 was cloned into TK792
TK955	YEp-pRPS28-FLAG-RPL27A	URA3	BamHI / PstI cassette from TK855 was cloned into TK792
TK957	YEp-pRPS28-FLAG-RPL35A	URA3	BamHI / PstI cassette from TK857 was cloned into TK792
TK959	YEp-pRPS28-FLAG-RPL25	URA3	BamHI / PstI cassette from TK865 was cloned into TK792
TK962	YEp-pRPS28-FLAG-RPL43	URA3	BamHI / PstI cassette from TK881 was cloned into TK792
TK963	YEp-pRPS28-FLAG-RPL8B	URA3	BamHI / PstI cassette from TK882 was cloned into TK792
TK965	YEp-pRPS28-FLAG-RPL19B	URA3	BamHI / PstI cassette from TK884 was cloned into TK792
TK968	YEp-pRPS28-FLAG-Ubq-RPL40A	URA3	BamHI / PstI cassette from TK887 was cloned into TK792
TK969	YEp-pRPS28-FLAG-RPL40A minus Ubq moiety	URA3	BamHI / PstI cassette from TK888 was cloned into TK792; lacks N-terminal ubiquitine moiety. FLAG tag N-terminally fused to rpL40A
TK1028	pRPS28-RPL2-Flag	URA3	product of a PCR with TK819 as template and primers O1664/O1273 was BamHI/PstI cloned into TK487
TK1029	pRPS28-RPL3-Flag	URA3	product of a PCR with TK822 as template and primers O1665/O1274 was BamHI/PstI cloned into TK487
TK1031	pRPS28-RPL10-Flag	URA3	product of a PCR with TK808 as template and primers O1663/O1279 was BamHI/PstI cloned into TK487
TK1032	pRPS28-RPL13-Flag	URA3	product of a PCR with TK823 as template and primers O1667/O1280 was BamHI/PstI cloned into TK487
TK1039	Ycp-pRPS28-eGFP-RPL33	URA3	BamHI / PstI cassette from TK813 was cloned into TK642
TK1041	Ycp-pRPS28-eGFP-RPL1B	URA3	BamHI / PstI cassette from TK818 was cloned into TK642
TK1045	Ycp-pRPS28-eGFP-RPL5	URA3	BamHI / PstI cassette from TK852 was cloned into TK642
