# Supplementary material for: Studies on the Assembly Characteristics of Large Subunit Ribosomal Proteins in S. cerevisae
Source: PLoS One. 2013 Jul 10;8(7):e68412. doi: 10.1371/journal.pone.0068412 (PMC3707915; doi:10.1371/journal.pone.0068412)
Supplement: Figure S4 — (XLSX) [file pone.0068412.s004.xlsx]

## Sheet: Sheet1
number	name	sequence ( 5´ to 3´ direction)
68	5.8SrRNA probe	TTTCGCTGCGTTCTTCAT
202	U3 sno-RNA probe	CCAACTTGTCAGACTGCCATT
205	18S probe	CATGGCTTAATCTTTGAGAC
207	A2/A3 probe	TGTTACCTCTGGGCCC
210	E/C2 probe	GGCCAGCAATTTCAAGTTA
212	25S probe	CTCCGCTTATTGATATGC
947	Yc-KpnI-Up	GATCTGGTACCGGATCCTCTAGAGTCGACCTGCA
948	Yc-KpnI-Do	GGTCGACTCTAGAGGATCCGGTACCA
989	Kpn-Met-yeGFP-UP	TTTTTTGGTACCATGATTCTGTCTAAAGGTGAAG
990	Bam-yeGFP-Do	TTTTTTGGATCCTTTGTACAATTCATCCATACC
1440	Glutamyl-tRNA probe	CGGTCTCCACGGTGAAAGC
1819	D/A2 probe	GTAAAAGCTCTCATGCTCTTGCC
2474	5S-rRNA probe	TTAACTACAGTTGATCGG
621	NOC2-TAP fw	AAGTGATGATGACAACGAAGATGTTGAAATGTCAGACGCT TCCATGGAAAAGAGAAG
622	NOC2-TAP rev	CTATTGAATTCAAGACAAAAAATCAAATCTTGCTGAGTTGTACGACTCACTATAGGG
2159	NOG1-TAP fw	CAAAGCATTTATTCAGTGGTAAGCGTGGTGTCGGTAAGACAGATTTCCGTTCCATGGAAAAGAGAAG
2160	NOG1-TAP rev	TCTCTACTTCTTATTCTTTCTTTTGCATGTACTTTAAAAAAAATATGATACGACTCACTATAGGG
2161	NOG2-TAP fw	AGGAAGGGGAAGAAAAACCAAAGAAGAAAGAAGTTGAGAAGACGGCATCCATGGAAAAGAGAAG
2162	NOG2-TAP rev	TCACTTGTAATCTTAAATTAATATTATACACCGGTTGTCCGTTTTTACCTTACGACTCACTATAGGG
2934	NOP53-TAP fw	AGTGCCCGTTAGGAAAGGTAGAAAGTATAAGCAGAAAATCACTGAAAAGTGGACACATAAGGACTTCAAATCCATGGAAAAGAGAAG
2935	NOP53-TAP rev	ATCTCACTTGATGAATCCACGTATCAAGGACAACCTTTTCATGGAAACATATACTGTAAAACAAAAAACTTACGACTCACTATAGGG
2932	RSA4-TAP fw	CGACTGGAGTGTCGACGGTAAAAGAGTGTGTAGTGGTGGGAAAGACAAGATGGTAAGATTGTGGACGCATTCCATGGAAAAGAGAAG
2933	RSA4-TAP rev	AAATGCAGTTCTATATCACAGTTATATAATATTTATATGTGCATGTATGTTACTTGTCTTTGCACATAACTACGACTCACTATAGGG
2936	ARX1-TAP fw	GGAAACGCAGCCAATGAAGCAGAAGAGTGTTGAGACATCAAATGGCGGAGTTGAAGAAACCATGAAAATGTCCATGGAAAAGAGAAG
2937	ARX1-TAP rev	AATATTCTATTTTACATTTTATGATATACTTATATTATTTATATACTAGCTTTAGAAATGATGAAGTTTCTACGACTCACTATAGGG
638	NOP7-TAP fw	GCCAAACAAAAAGCTAAACTGAATAAACTAGATTCCAAGAAATCCATGGAAAAGAGAAG
639	NOP7-TAP rev	AGACAAAATTTTTGAGAGGCTATTGGAAAAGAAGAGAAAATACGACTCACTATAGGG
618	RPS-Flag-Ct-PstI	TTTTTTCTGCAGTTACTTATCGTCGTCATCCTTGTAATCCATTAAAGCCTTCTTGGCGGCATC
496	GalRPS26A_F_Bam	CGCCGCGGATCCATGCCAAAGAAGAGAGCT
1266	pRPS28_mod_for	CTTGGCGCCGAATTCATGCATGCTTATTCATGTTCGAA
1267	pRPS28_mod_rev	GAAGGCGCCGAATTCAAGCTTGCATGCCTGC
581	RPS28B-Prom-F2	TTTTTTGAATTCGCTTATTCATGTTCGAATC
582	RPS28B-Prom-Rv-FLAG	TTTTTTGGATCCGGTACCCTTATCGTCGTCATCCTTGTAATCCATTGCTGCTCTTTTATGCTTTGC
1664	RPL2B-Orf-Rev	TTTTTTCTGCAGATCTTGGGTCTTTTGAGAACC
1273	RPL2B-Start-BAM	TTTTTTGGATCCATGGGTAGAGTTATTCGTAACCAA
1665	RPL3-Orf-Rev	TTTTTTCTGCAGCAAGTCCTTCTTCAAAGTACC
1274	RPL3-Start-BAM	TTTTTTGGATCCATGTCTCACAGAAAGTACGAAG
1663	RPL10-ORf-Rev	TTTTTTCTGCAGAGCTTGAGCAGCAAAGTATTC
1279	RPL10-Start-BAM	TTTTTTGGATCCATGGCTAGAAGACCAGCTAG
1667	RPL13-Orf-Rev	TTTTTTCTGCAGTTTCTTCTTTTCAGCTTCAGC
1280	RPL13-Start-BAM	TTTTTTGGATCCATGGCCATTTCCAAGAATTTACCA
1438	RPL40A-Gal-Bam	TTTTTTGGATCCATGCAAATTTTTGTCAAGACTTTGACTG
1424	RPL40A-Do2-Pst	TTTTTTCTGCAGATACCACCGCTACGCGTTGAC
